# Supplementary material for: Tma108, a putative M1 aminopeptidase, is a specific nascent chain-associated protein in Saccharomyces cerevisiae
Source: PubMed Central journal article supplement — Nucleic Acids Res. 2016 Aug 31;44(18):8826–41. doi: 10.1093/nar/gkw732 (PMC5062994; doi:10.1093/nar/gkw732), 2016-08-31
Supplement: supp_gkw732_nar-03492-v-2015-File003.pdf [file supp_gkw732_nar-03492-v-2015-File003.pdf]

**Tma108, a putative M1 aminopeptidase, is a specific nascent-chain associated protein in *Saccharomyces cerevisiae*. Delaveau et al.**

### **Description of the additional information**

#### **Supplementary methods**

Supplementary information for material and method section.

#### **Supplementary Table 1**

Yeast strains

#### **Supplementary Table 2**

Plasmids and derived strains

#### **Supplementary Table 3**

Oligonucleotides used for quantitative PCR

#### **Supplementary Table 4**

Proteins used for multiple alignment

#### **Supplementary Table 5**

Fig. 1b additional information: Microarray log<sub>2</sub> data of mitochondrial extraction experiments

#### **Supplementary Table 6**

Fig. 2 additional information: Protein detected with MS analysis in Tma108 immunoprecipitations

#### **Supplementary Table 7**

Fig. 3 additional information: Microarray log<sub>2</sub> data of Tma128, Scp160, Tma46 and Rpl16a immunoprecipitation experiments

#### **Supplementary Table 8**

Fig. 3 additional information: Tma108, Scp160 and Tma46 targets identified with Limma analysis of microarrays data

#### **Supplementary Table 9**

Fig. 3 additional information: Microarray enrichment analysis for Gene Ontology compartment

#### **Supplementary Table 10**

Fig. 3 additional information: Microarray enrichment analysis for Gene Ontology function

#### **Supplementary Table 11**

Fig. 3 additional information: Microarray enrichment analysis for Pfam domains

#### **Supplementary Table 12**

Fig. 5 additional information: Protein detected with MS analysis in Tma108, Scp160, Tma108 and Rpl16a immunoprecipitations

**Supplementary Data 1**

Fig. 4 additional information: Full annotated alignment of Tma108 with M1 aminopeptidases

**Supplementary Figure 1**

Protein score distribution obtained in mass spectrometry analysis of immunoprecipitation experiments

**Supplementary Figure 2**

Phylogenic tree showing Tma108, Aap1 et Ape2 orthologues in *Saccharomycetaceae*.

**Supplementary Figure 3**

Tma108 positioning in a phylogenic tree of M1 aminopeptidases

**Supplementary Figure 4**

Hypothesis to explain the impact of Tma108 on *ATP2* mRNA localization to mitochondria

**Supplementary Figure 5**

*ATP2* mRNA localization phenotype and functional complementation of Tma108 deletion

**Supplementary Figure 6**

Surexpression of Tma108 induces a delocalization of *ATP2* mRNA

**Supplementary Figure 7**

Tma108 recognize the N-terminal part of the nascent peptide: control and additional experiments

**Supplementary Figure 8**

Tma108 deletion does not impact the steady state level of the global proteome
