# Supplementary material for: Tma108, a putative M1 aminopeptidase, is a specific nascent chain-associated protein in Saccharomyces cerevisiae
Source: PubMed Central journal article supplement — Nucleic Acids Res. 2016 Aug 31;44(18):8826–41. doi: 10.1093/nar/gkw732 (PMC5062994; doi:10.1093/nar/gkw732), 2016-08-31
Supplement: supp_gkw732_nar-03492-v-2015-File004.pdf [file supp_gkw732_nar-03492-v-2015-File004.pdf]

## Supplementary information

**Table S1: Yeast strains**

| Stain                  | Genotype                                                                                                            | Origin                            |
|------------------------|---------------------------------------------------------------------------------------------------------------------|-----------------------------------|
| BY4741                 | MATa; his3Δ1; leu2Δ0; met15Δ0; ura3Δ0                                                                               | Euroscarf (Brachmann et al, 1998) |
| BY4743                 | MATa/MATα his3Δ1/his3Δ1; leu2Δ0 /leu2Δ0; met15Δ0/MET15; LYS2/lys2Δ 0; ura3Δ0/ura3Δ0                                 | Euroscarf (Brachmann et al, 1998) |
| <i>tma108Δ/TMA108+</i> | MATa/MATα his3Δ1/his3Δ1; leu2Δ0 /leu2Δ0; met15Δ0/MET15; LYS2/lys2Δ 0; ura3Δ0/ura3Δ0: TMA108::KanMX4/ TMA108::KanMX4 | Euroscarf (Brachmann et al, 1998) |
| <i>tma108Δ/Δ</i>       | MATa/MATα his3Δ1/his3Δ1; leu2Δ0 /leu2Δ0; met15Δ0/MET15; LYS2/lys2Δ 0; ura3Δ0/ura3Δ0: TMA108::KanMX4/ TMA108         | Euroscarf (Brachmann et al, 1998) |
| <i>tma7Δ/Δ</i>         | MATa/MATα his3Δ1/his3Δ1; leu2Δ0 /leu2Δ0; met15Δ0/MET15; LYS2/lys2Δ 0; ura3Δ0/ura3Δ0: TMA7::KanMX4/ TMA7::KanMX4     | Euroscarf (Brachmann et al, 1998) |
| <i>tma19Δ/Δ</i>        | MATa/MATα his3Δ1/his3Δ1; leu2Δ0 /leu2Δ0; met15Δ0/MET15; LYS2/lys2Δ 0; ura3Δ0/ura3Δ0: TMA19::KanMX4/ TMA19::KanMX4   | Euroscarf (Brachmann et al, 1998) |
| <i>tma22Δ/Δ</i>        | MATa/MATα his3Δ1/his3Δ1; leu2Δ0 /leu2Δ0; met15Δ0/MET15; LYS2/lys2Δ 0; ura3Δ0/ura3Δ0: TMA22::KanMX4/ TMA22::KanMX4   | Euroscarf (Brachmann et al, 1998) |
| <i>tm46Δ/Δ</i>         | MATa/MATα his3Δ1/his3Δ1; leu2Δ0 /leu2Δ0; met15Δ0/MET15; LYS2/lys2Δ 0; ura3Δ0/ura3Δ0: TMA46::KanMX4/ TMA46::KanMX4   | Euroscarf (Brachmann et al, 1998) |
| <i>tae1Δ/Δ</i>         | MATa/MATα his3Δ1/his3Δ1; leu2Δ0 /leu2Δ0; met15Δ0/MET15; LYS2/lys2Δ 0; ura3Δ0/ura3Δ0: TAE1::KanMX4/ TAE1::KanMX4     | Euroscarf (Brachmann et al, 1998) |
| <i>tae2Δ/Δ</i>         | MATa/MATα his3Δ1/his3Δ1; leu2Δ0 /leu2Δ0; met15Δ0/MET15; LYS2/lys2Δ 0; ura3Δ0/ura3Δ0: TAE2::KanMX4/ TAE2::KanMX4     | Euroscarf (Brachmann et al, 1998) |
| <i>tma20Δ/Δ</i>        | MATa/MATα his3Δ1/his3Δ1; leu2Δ0 /leu2Δ0; met15Δ0/MET15; LYS2/lys2Δ 0; ura3Δ0/ura3Δ0: TMA20::KanMX4/ TMA20::KanMX4   | Euroscarf (Brachmann et al, 1998) |
| <i>rpl38Δ/Δ</i>        | MATa/MATα his3Δ1/his3Δ1; leu2Δ0 /leu2Δ0; met15Δ0/MET15; LYS2/lys2Δ 0; ura3Δ0/ura3Δ0: RPL38::KanMX4/ RPL38::KanMX4   | Euroscarf (Brachmann et al, 1998) |
| <i>rps7aΔ/Δ</i>        | MATa/MATα his3Δ1/his3Δ1; leu2Δ0 /leu2Δ0; met15Δ0/MET15; LYS2/lys2Δ 0; ura3Δ0/ura3Δ0: RPS7A::KanMX4/ RPS7A::KanMX4   | Euroscarf (Brachmann et al, 1998) |
| Tma108-PA              | MATa; his3Δ1; leu2Δ0; met15Δ0; ura3Δ0, TMA108-ProtA-His5                                                            | This study* <sup>1</sup>          |
| Rpl16A-PA              | MATa; his3Δ1; leu2Δ0; met15Δ0; ura3Δ0, RPL16A-ProtA-His5                                                            | This study* <sup>1</sup>          |
| Tma46-PA               | MATa; his3Δ1; leu2Δ0; met15Δ0; ura3Δ0, TMA46-ProtA-His5                                                             | This study* <sup>1</sup>          |
| Scp160-PA              | MATa; his3Δ1; leu2Δ0; met15Δ0; ura3Δ0, SCP160-ProtA-His5                                                            | This study* <sup>1</sup>          |
| Tma108(MAMQN)-PA       | MATa; his3Δ1; leu2Δ0; met15Δ0; ura3Δ0, tma108(E296Q)-ProtA-His5                                                     | This study* <sup>2</sup>          |

\*<sup>1</sup>Strains tagged at their C terminus were obtained from BY4741 strain, after classical procedure of Lithium acetate transformation, by homologous recombination with ProtA-His5 cassette amplified from pBXA (Rout et al., 2000 , provided by M. Rout, The Rockefeller, University, New York, NY).

\*<sup>2</sup> Genomic DNA of Tma108-PA strain was used to amplify a fragment of TMA108 fused with the ProtA-His5 sequence and carrying the desired mutation added in the forward primer (AGTGACATGGCAATGCAGAACTTTGGTATGATCACC) used for the PCR. This mutagenesis cassette was used to modify by homologous recombination TMA108 locus in BY4741 strain. DNA sequencing of TMA108 locus allowed identifying a mutant strain among the 24 clones obtained on the selective plate after the transformation.

**Table S2: Plasmids and derived strains**

BY4743 strain was transformed with pRS416 derived plasmid pTMA108 and pGTG.

| pRS416 derivatived plasmid (origin) | Inserted sequence                                                              | Experiment                  |
|-------------------------------------|--------------------------------------------------------------------------------|-----------------------------|
| pTMA108<br>(origin: This study)     | TMA108(-840→3559)<br>PGK1 terminator                                           | Functionnal complementation |
| PGTG<br>(origin: This study)        | GAL1 promotor<br>TMA108(-11→3559)<br>13myc tag (C terminal)<br>PGK1 terminator | Tma108 overexpression       |

Tma108-PA strain was transformed with the following pRS416 derived plasmids

| pRS416 derivatived plasmid (Origin)   | Inserted sequence                                                          | Experiment                                           |
|---------------------------------------|----------------------------------------------------------------------------|------------------------------------------------------|
| pZMYA7<br>(This study)                | ZWF1 promotor<br>ASN1(1-1717)-13myc<br>PGK1 terminator                     | Search of signals required for<br>Tma108 recruitment |
| pZMYA7M1<br>(This study)              | ZWF1 promotor<br>ASN1(1-1717)-13myc<br>with mutated ATG<br>PGK1 terminator |                                                      |
| pZMYA11<br>(This study)               | ZWF1 promotor<br>ASN1(105-1717)-13myc<br>PGK1 terminator                   |                                                      |
| pZLG<br>(Garcia et al., embor, 2010 ) | ZWF1 promotor<br>LacZ<br>PGK1 terminator                                   |                                                      |
| pZLGpn42<br>(This study)              | ZWF1 promotor<br>ASN1(1-35)-LacZ<br>PGK1 terminator                        |                                                      |

|                                            |                                                                          |  |
|--------------------------------------------|--------------------------------------------------------------------------|--|
| pZFG pn4<br>(Garcia et al., embor, 2010 )  | ZWF1 promotor<br>ATP2(1-1533)-ZTag<br>PGK1 terminator                    |  |
| pZFGpn4M2<br>(Garcia et al., embor, 2010 ) | ZWF1 promotor<br>ATP2(1-1533)-ZTag with<br>frameshift<br>PGK1 terminator |  |
| pZFGpn14<br>(Garcia et al., embor, 2010 )  | ZWF1 promotor<br>ATP2(99-1533)-ZTag<br>PGK1 terminator                   |  |

**Table S3: Oligonucleotides used for quantitative PCR**

| Gene  | ORF       | Oligonucléotide Name | Sequence 5' →3'            |
|-------|-----------|----------------------|----------------------------|
| ATP1  | YBL099W   | Q_ATP1for            | GGGTAGAGTTGTCGACGCTTAGG    |
| ATP1  | YBL099W   | Q_ATP1rev            | TGACCTCTACCGATAGGGACC      |
| ATP15 | YPL271W   | Q_ATP15for           | GTCTGCCTGGAGGAAAGCTGG      |
| ATP15 | YPL271W   | Q_ATP15rev           | GAGTGGGTTTCAGAAGCTGCAG     |
| ATP16 | YDL004W   | Q_ATP16for           | CCTGCCTGCTAAGTCAGGACG      |
| ATP16 | YDL004W   | Q_ATP16rev           | GCGAGTCTGGTTGAACTGTTGC     |
| ATP17 | YDR377W   | Q_ATP17for           | GTTCGGCACCAAATGCCAAGC      |
| ATP17 | YDR377W   | Q_ATP17rev           | GCCACAATGGTTTACCACTAGC     |
| ATP18 | YML081C-A | Q_ATP18for           | GAAAAGATTCCCTACCCCTATCC    |
| ATP18 | YML081C-A | Q_ATP18rev           | GCGAATCTGGGATTTCTTGATC     |
| ATP19 | YOL077W-A | Q_ATP19for           | CTATCCCTCCACCAACTAGC       |
| ATP19 | YOL077W-A | Q_ATP19rev           | CGCATCTTGCTTTTCCGAATGTTTC  |
| ATP2  | YJR121W   | Q_ATP2for            | GTGGTGCAGGTGTCGGTAAGAC     |
| ATP2  | YJR121W   | Q_ATP2rev            | ACGGTACAAGTCATTACCTTCTC    |
| ATP20 | YPR020W   | Q_ATP20for           | CCAGTGGGTTGGTTTCTAAAGC     |
| ATP20 | YPR020W   | Q_ATP20rev           | TTAGAGCAAAGTTTAGGCTCTGC    |
| ATP3  | YBR039W   | Q_ATP3for            | AAGAAGATGGATGAAGCAGAGCAG   |
| ATP3  | YBR039W   | Q_ATP3rev            | CCTTATCAGAGGTGATAGCAAC     |
| ATP4  | YPL078C   | Q_ATP4for            | ACTGTTGAACTTGAAAGCGAAGC    |
| ATP4  | YPL078C   | Q_ATP4rev            | GACTGAACTCTGGAGATGACAG     |
| ATP5  | YDR298C   | Q_ATP5for            | GTGAGATTGTTCCGGTGTGAGG     |
| ATP5  | YDR298C   | Q_ATP5rev            | CTGTCCTTCAATGACAATGCAGG    |
| ACT1  | YFL039C   | Q_ACTfor             | GGTTGCTGCTTTGGTTATTG       |
| ACT1  | YFL039C   | Q_ACTrev             | GACCCATACCGACCATGATAC      |
| TPM2  | YIL138C   | Q_TPM2for            | CGAGCAACTCGACAGTGAAGTGG    |
| TPM2  | YIL138C   | Q_TPM2rev2           | ATCCATTGCTTCCTTCAGTTTGG    |
| JEN1  | YKL217W   | Q_jen1for            | CGAGATTTACGTCCTTACTGC      |
| JEN1  | YKL217W   | Q_jen1rev            | GAGCGACTGATACTGAAACG       |
| FLR1  | YBR008C   | Q_FLR1for            | CGTGGAATGTGTGTCTGCTGGTGCCT |
| FLR1  | YBR008C   | Q_FLR1rev            | CCAATGCACTCGAGCAGTCCAACCA  |

|           |         |              |                            |
|-----------|---------|--------------|----------------------------|
| ASN1      | YPR145W | S1_asn1for   | GACTGTGACACTATCACTGC       |
| ASN1      | YPR145W | Q_asn1rev    | CGATTAAGAGGAGTCCAAACC      |
| VMA1      | YDL185W | S1_vma1      | GAGGTACAATCACTTGGATTGC     |
| VMA1      | YDL185W | Q_vma1rev    | CCTGGAATACATGTCGTACCACC    |
| ASN1-Myc  | /       | Q_ASN1for    | CCAACCACAAAAGAGGCTTCTGG    |
| ASN1-Myc  | /       | Q_ASN1mycrev | GCTTTTGTTCACCGTTAATTAATTCG |
| LacZ      | /       | Q_LacZfor    | CGTCACGAGCATCATCCTCTGC     |
| LacZ      | /       | Q_lacZrev    | GTCGCACAGCGTGTACCACAGC     |
| ATP2-Ztag | /       | Q_lacZpn4for | GGACACCGTTGCCTCGTTCAAAGC   |
| ATP2-Ztag | /       | Q_lacZpn4rev | GCTCATCCGCCACATATCCTGATC   |

**Table S4: Proteins used for multiple alignment**

| <b>M1 metallopeptidases</b>                             |                                 |                         |
|---------------------------------------------------------|---------------------------------|-------------------------|
| <b>Name</b>                                             | <b>Specie</b>                   | <b>Accession number</b> |
| TMA108 [Translation Machinery associated factor 108]    | <i>Saccharomyces cerevisiae</i> | NP_012129.1             |
| APE2 [Aminopeptidase yscII]                             | <i>Saccharomyces cerevisiae</i> | NP_012765.3             |
| AAP1 [Arginine/alanine amino peptidase]                 | <i>Saccharomyces cerevisiae</i> | NP_011913               |
| PSA [puromycin-sensitive aminopeptidase]                | <i>Homo sapiens</i>             | NP_006301.3             |
| AP-Q [aminopeptidase Q]                                 | <i>Homo sapiens</i>             | NP_776161.3             |
| Ap-N [aminopeptidase N]                                 | <i>Homo sapiens</i>             | AAA51719.1              |
| TRH-DE [thyrotropin-releasing hormone degrading enzyme] | <i>Homo sapiens</i>             | EAW97281.1              |
| Ap-A [aminopeptidase A]                                 | <i>Homo sapiens</i>             | CAP09201.1              |
| ERAP1 [endoplasmic reticulum aminopeptidase 1]          | <i>Homo sapiens</i>             | NP_057526.3             |
| ERAP2 [endoplasmic reticulum aminopeptidase 2]          | <i>Homo sapiens</i>             | XP_011541846.1          |
| ePepN [E. coli Aminopeptidase N]                        | <i>Escherichia coli</i>         | P04825                  |
| IRAP [oxytocinase/insulin-responsive aminopeptidase]    | <i>Homo sapiens</i>             | CAB94753.1              |
| LTA4H [Human Leukotriene A4 Hydrolase]                  | <i>Homo sapiens</i>             | 3U9W                    |
| Ap-B [aminopeptidase B]                                 | <i>Homo sapiens</i>             | CAC14047.1              |
| RNPEP-L1 [arginyl aminopeptidase-like 1]                | <i>Homo sapiens</i>             | NP_060696.4             |
| <b>TMA108 orthologues</b>                               |                                 |                         |
| <b>Specie</b>                                           | <b>Accession number</b>         |                         |
| <i>Saccharomyces bayanus</i>                            | AACG02000025                    |                         |
| <i>Zygosaccharomyces rouxii</i>                         | XP_002496293                    |                         |
| <i>Kluyveromyces lactis</i>                             | XP_454307                       |                         |
| <i>Lachancea thermotolerans</i>                         | XP_002555415                    |                         |
| <i>Saccharomyces kluyveri</i>                           | AAAE03000003                    |                         |
| <i>Ashbya gossypii</i>                                  | NP_985281                       |                         |
| <i>Candida glabrata</i>                                 | XP_449140                       |                         |
| <i>Naumovozyma castellii</i>                            | XP_003675117                    |                         |
| <i>Vanderwaltozyma polyspora</i>                        | XP_001647329                    |                         |
| <i>Kazachstania africana</i>                            | XP_003959375                    |                         |
| <i>Debaryomyces hansenii</i>                            | XP_457134                       |                         |
| <i>Scheffersomyces stipitis</i>                         | XP_001383787                    |                         |

|                                  |              |
|----------------------------------|--------------|
| <i>Millerozyma farinosa</i>      | XP_004204526 |
| <i>Meyerozyma guilliermondii</i> | EDK39075     |
| <i>Spathaspora passalidarum</i>  | EGW30536     |
| <i>Candida tropicalis</i>        | XP_002548472 |
| <i>Clavispora lusitaniae</i>     | XP_002616570 |

### Mass spectrometry procedure

Digestion was performed overnight at 37°C in the presence of 12.5 µg/ml of sequencing grade trypsin (Promega, Madison, WI, USA). Digests were analyzed by a LTQ Velos Orbitrap (Thermo Fisher Scientific, San Jose, CA) coupled to an Easy nano-LC Proxeon system (Thermo Fisher Scientific, San Jose, CA). Chromatographic separation of peptides was performed with the following parameters: column Easy Column Proxeon C18 (10 cm, 75 µm i.d., 120 Å), 300nl/min flow, gradient rising from 95 % solvent A (water - 0.1% formic acid) to 25% B (100 % acetonitrile, 0.1% formic acid) in 20 min, then to 45% B in 40 min and finally to 80% B in 10 min. Peptides were analyzed in the Orbitrap in full ion scan mode at a resolution of 30,000 and a mass range of 400-1800 m/z. Fragments were obtained with a collision-induced dissociation (CID) activation with a collisional energy of 40%, an activation Q of 0.25 for 10 ms, and analyzed in the LTQ. MS/MS data were acquired in a data dependent mode in which 20 most intense precursor ions were isolated, with a dynamic exclusion of 20 seconds and an exclusion mass width of 10 ppm. Data were processed with Proteome Discoverer 1.4 software (Thermo Fisher scientific, San Jose, CA) coupled to an in-house Mascot search server (Matrix Science, Boston, MA; version 2.4.1). The mass tolerance of fragment ions was set to 7 ppm for precursor ions and 0.5 Dalton for fragments. The following modifications were considered in mass calculation: oxidation (M), phosphorylations (STY), acetylation (Nterm, K), deamidation (NQ). The maximum number of missed cleavages was limited to 2 for trypsin digestion. MS/MS data were searched against the SwissProt database with the *S.cerevisiae* taxonomy.
