# Supplementary material for: Tma108, a putative M1 aminopeptidase, is a specific nascent chain-associated protein in Saccharomyces cerevisiae
Source: PubMed Central journal article supplement — Nucleic Acids Res. 2016 Aug 31;44(18):8826–41. doi: 10.1093/nar/gkw732 (PMC5062994; doi:10.1093/nar/gkw732), 2016-08-31
Supplement: supp_gkw732_nar-03492-v-2015-File014.pdf [file supp_gkw732_nar-03492-v-2015-File014.pdf]

Cons

TMA108 M S - - - - - 2

Ap-N M A K G F - - - - - Y I S K S L G - - - - - 12

AP-Q M G P P - - - - - S S S G F Y V - - - - - S R A V A - - - - - 16

TRH-DE M A L D G - - - - - E L G E Q E E E K K K K K K R K K K K E E E E E E - - - - - G A E K S S S P F A A A M G - - - E D D A A L R A G S R G L S D P W A D S V G 69

ERAP2 M F H - - - - - S S A M V N S H R K - - - - - P M F N I H R G - - - - - 21

ERAP1 M V - - - - - F L P L K W S - - - - - 9

IRAP M F E E E P D V V D L A K E P C L H P L E P D E V E Y E P R G S R L L V R G L G E H E M E E V E E D Y E S S A K L L G M S F M N R S S G L R N S A T G Y R Q S P D G A C S V P S A R T M - - - - - 92

Ap-A M N - - - - - F A E R E G S K R Y C - - - - - I Q T K H V A - - - - - 20

PSA M W - - - - - L A A A A P S L A - - - - - 11

AAP1 M S - - - - - 2

APE2 M P - - - - - I V R W L L L K S A V R G S S L I G K A - - - - - H P C L R S I A A - - - - - 31

LTA4H I V - - - - - D T C S - - - - - 6

Ap-B M V - - - - - S G - - - - - 4

RNPEP-L1 M A - - - - - A Q C C C - - - - - 7

ePepN M T - - - - - 2

Cons

TMA108 - - - - - 2

Ap-N - - - - - I L G I L L G V A A V C T I I A L S V V - - - - - Y S Q - - - - - E K N K N A N S S P - - - - - V A S T T P S A S A T T 57

AP-Q - - - - - L L L A G L V A A L L L A L A V L A A L - - - - - Y G H C E R V P - - - - - P S - - - - - E L P G - - - L R D L E A E S S P P L - - - R Q K P T P T P K P S S A R 76

TRH-DE V R P R T T E R H I A V H K R L V L A F A V S L V A L L A V T M L A V L L S L R F D E C G A S A T P G A D G G P S G F P E R G G N G S L P G S A R R N H H A G G D S - - - - - W Q P E A G G V A S P G T 164

ERAP2 - - - - - F Y C L T A I L P Q I C I C S Q F S V P S S Y H F T E D - - - - - P G A F P V A T N G E 60

ERAP1 - - - - - L A T M S F L L S S L L A L L T V S T P S W C Q S T E - - - - - A S P K R S D G T 45

IRAP - - - - - V V C A F V I V V A V S V I M V I Y L L P R C T F T K E G - - - - - C H K K N Q S - - - - - I G L I Q P F A T N G K 140

Ap-A - - - - - I L C A V V V G V G L I V G L A V G L T R S C D S S G D G G - - - - - P G T A P A P S H L P S S T - - - - - A S P S G P P A Q D Q D I 77

PSA - - - - - R R L L F L G P P P P L L L L V - - - - - F S R S S - - - - - R R R L H S L G L A - - - - - A M P E K R P F E - - - - - 52

AAP1 - - - - - 2

APE2 - - - - - H P R Y L S N V Y S P P A G V S R S L R I N V M - - - - - W K Q S K L T P - - - - - P R - - - - - F - - V K I M N R R P L F T E T S 80

LTA4H - - - - - L A S P - - - - - 10

Ap-B - - - - - E H S P G S G A A - - - - - R R P L H - - - - - S A Q A V 23

RNPEP-L1 - - - - - R Q A P G A E A A - - - - - P V R P - - - - - P P E P P P A L 28

ePepN - - - - - Q Q P Q A K - - - - - 8

Cons

TMA108 - - - - - D N L L S L E N P V V P S H Y E L R L E I D P K - - - - - Q S S P N F K G S A I I H L K F N P N S T T L A S I E D S F T Q F K L H S K D - L I V L S A H - - - - - 72

Ap-N N P A S A T T L D Q S - - - K A W N R Y R L P N T L K P D S Y Q V T L R P Y L T P N D - - R G L Y V F K G S S T V R F T C K E - A T D V - - - - - I I I H S K K - L N Y T L S Q - G H R V V L - 139

AP-Q E L A V T T T P S N W R P P G P W D Q L R L P P W L V P L H Y D L E L W P Q L R P D E L P A G S L P F T G R V N I T V R C T V - A T S R - - - - - L L L H S L F - Q D C E R A E - V R G P L S - 163

TRH-DE T S A Q P P S E E E R E P W E P W T Q L R L S G H L K P L H Y N L M L T A F M E - - - - - N F T F S G E V N V E I A C R N - A T R Y - - - - - V V L H A S R - V A V E K V Q - L A E D R A - 244

ERAP2 R F P - - - - - W Q E L R L P S V V I P L H Y D L F V H P N L T - - - - - S L D F V A S E K I E V L V S N - A T Q F - - - - - I I L H S K D - L E I T N A T - L Q S E E D - 127

ERAP1 P F P - - - - - W N K I R L P E Y V I P V H Y D L L I H A N L T - - - - - T L T F W G T T K V E I T A S Q - P T S T - - - - - I I L H S H H - L Q I S R A T - L R K G A G - 112

IRAP L F P - - - - - W A Q I R L P T A V V P L R Y E L S L H P N L T - - - - - S M T F R G S V T I S V Q A L Q - V T W N - - - - - I I L H S T G - H N I S R V T - F M S A V S - 207

Ap-A C P A S E D E S G Q - - - - - W K N F R L P D F V N P V H Y D L H V K P L L E - - - - - E D T Y T G T V S I S I N L S A - P T R Y - - - - - L W L H L R E - T R I T R L P E L K R P S G - 152

PSA - - - - - R L P A D V S P I N Y S L C L K P D L L - - - - - D F T F E G K L E A A A Q V R Q - A T N Q - - - - - I V M N C A D - I D I I T A S - Y A P E G D - 112

AAP1 - - - - - R E V L P N N V T P L H Y D I T L E P N F R - - - - - A F T F E G S L K I D L Q I N D H S I N S - - - - - V Q I N Y L E - I D F H S A R - - - - - 59

APE2 H A C A K C Q K T S Q L L N K T P N R E I L P D N V V P L H Y D L T V E P D F K - - - - - T F K F E G S V K I E L K I N N P A I D T - - - - - V T L N T V D - T D I H S A K - - - - - 155

LTA4H - - - - - A S V C R T - - - - - K H L H L R C S V D F T - - - - - R R T L T G T A A L T V Q S Q E D N L R S - - - - - L V L D T K D - L T I E K V V - I N G - - - - - 66

Ap-B D V A S A S N - - - - - F R A F E L - - - - - L H L H L D L R A E F G P P G P G A G S R G L S G T A V L D L R C L E P E G A A - - - - - E L R L D S H P C L E V T A A A - L R R - - - - - 95

RNPEP-L1 D V A S A S S - - - - - A Q L F R L - - - - - R H L Q L G L E L R P E - - - - - A R E L A G C L V L E L C A L R P A P R A - - - - - L V L D A H P A L R L H S A A - F R R A P A A 96

ePepN - - - - - Y R H D Y R A P D Y Q I - - - T D I D L T F D L D - - - - - A Q K T V V T A V S Q A V R H G - - A S D A - - - - - P L R L N G E D - L K L V S V H - - - - - 65

Cons

TMA108 - - - - - A T I - - - - G S T K F D L K I S Q D T - G K H L S I F N S E S P I Q L S N D C P - L I L S V Q Y V G K I R D I K T H H D K T F G I F K T N 136

Ap-N - - - - - R G V G - - - - - G S Q P P - - D I D K T E L V E P T E Y - - - - L V V H L K G - S L V K D S Q - - - Y E M D S E F E G E L - - - - - A D D L A G F Y R S E 197

AP-Q - - - - - P G T G N - - - - - A T V G R V - - - - P V D D V W F A L D T E Y - - - - M V L E L S E - P L K P G S S - - - Y E L Q L S F S G L V K - - - - - E D L R E G L F L N V 224

TRH-DE - - - - - F G A V - - - - P V A G F F L Y P Q T Q V - - - - L V V V L N R - T L D A Q R N - - - Y N L K I I Y N A L I - - - - - E N E L L G F F R S S 297

ERAP2 - - - - - S R Y M K P G K E L K V L S Y P A H E Q - - - - I A L L V P E - K L T P H L K - - - Y Y V A M D F Q A K L - - - - - G D G F E G F Y K S T 183

ERAP1 - - - - - E R L S E - - E P L Q V L E H P R Q E Q - - - - I A L L A P E - P L L V G L P - - - Y T V V I H Y A G N L - - - - - S E T F H G F Y K S T 166

IRAP - - - - - S Q E - - - - K Q A E I L E Y A Y H G Q - - - - I A I V A P E - A L L A G H N - - - Y T L K I E Y S A N I - - - - - S S S Y Y G F Y G F S 259

Ap-A - - - - - D Q V - - - - Q V R R C F E Y K K Q E Y - - - - V V V E A E E - E L T P S S G D G L Y L L T M E F A G W L - - - - - N G S L V G F Y R T T 207

PSA - - - - - E E I - - - - H A T G F N Y Q N E D E K - - - - V T L S F P S - T L Q T G T G - - - - T L K I D F V G E L - - - - - N D K M K G F Y R S K 163

AAP1 - - - - - I E G V - - - - N A I E V N K N E N Q Q K - - - - A T L V F P N G T F E N L G P S - - A K L E I I F S G I L - - - - - N D Q M A G F Y R A K 114

APE2 - - - - - I G D V - - - - T S S E I I S E E E Q Q V - - - - T T F A F P K G T M S S F K G N - - A F L D I K F T G I L - - - - - N D N M A G F Y R A K 210

LTA4H - - - - - Q E V K Y A L G E R Q S Y K G S P M E I S L P I - A L S K N Q E - - - I V I E I S F E T - - - - - S P K S S A L Q W L T 117

Ap-B - - - - - E R P G S E E P P A E P V S F Y T Q P F S H Y - G Q A L C V S F P Q - P C R A A E R - - - L Q V L L T Y R V - - - - - G E G - P G V C W L A 154

RNPEP-L1 A A E T P C A F A F S A P G P G P A P P P L P A F P E A P G S E P A - C C P L A F R V D P F T D Y - G S S L T V T L P P - E L Q A H Q P - - - F Q V I L R Y T S - - - - - T D A - P A I W W L D 181

ePepN - - - - - I N D E P W T A W K E E E - G A L V I S N L P E - - - - - R - F T L K I I N E I S P A - - - - - A N T A L E G L Y Q - - 111

Cons

TMA108 F M D R K T G T A N N H V V A T H C Q P F S A S N I F P C I D E P S N K S T F Q L N I A T D A - - Q Y K A V S N T P V E M V E A - - L D S S Q - - - K H L V K F A K T P L M T T S V F G F S I G D L E F 229

Ap-N Y M - - - E G N V R K V V A T T Q M Q A A D A R K S F P C F D E P A M K A E F N I T L I H P K - - D L T A L S N M L P K G P S T P L P E D P N - - - W N V T E F H T T P K M S T Y L L A F I V S E F D Y 289

AP-Q Y T D Q - - G E R R - A L L A S Q L E P T F A R Y V F P C F D E P A L K A T F N I T M I H H P - - S Y V A L S N M P K L G Q S E - - K E D V N G S K W T V T T F S T T P H M P T Y L V A F V I C D Y D H 317

TRH-DE Y V L H - - G E R R - F L G V T Q F S P T H A R K A F P C F D E P I Y K A T F K I S I K H Q A - - T Y L S L S N M P V E T S V F - - E E D G - - - W V T D H F S Q T P L M S T Y Y L A W A I C N F T Y 386

ERAP2 Y R T L - G G E T R - I L A V T D F E P T Q A R M A F P C F D E P L F K A N F S I K I R R E S - - R H I A L S N M P K V K T I E - - L E G G - - - L L E D H F E T T V K M S T Y L V A Y I V C D F H S 273

ERAP1 Y R T K - E G E L R - I L A S T Q F E P T A A R M A F P C F D E P A F K A S F S I K I R R E P - - R H L A I S N M P L V K S V T - - V A E G - - - L I E D H F D V T V K M S T Y L V A F I I S D F E S 256

IRAP Y T D E - S N E K K - Y F A A T Q F E P L A A R S A F P C F D E P A F K A T F I I K I I R D E - - Q Y T A L S N M P K K S S V V - - L D D G - - - L V Q D E F S E S V K M S T Y L V A F I V G E M K N 349

Ap-A Y T E N - - G Q V K - S I V A T D H E P T D A R K S F P C F D E P N K K A T Y T I S I T H P K - - E Y G A L S N M P V A K E E S - - V D D K - - - W T R T T F E K S V P M S T Y L V C F A V H Q F D S 296

PSA Y T T P - S G E V R - Y A A V T Q F E A T D A R R A F P C W D E P A I K A T F D I S L V V P K - - D R V A L S N M N V I D R K P - Y P D D E N - - - L V E V K F A R T P V M S T Y L V A F V V G E Y D F 255

AAP1 Y T D K V T G E T K - Y M A T T Q M E A T D A R R A F P C F D E P N L K A T F A V T L V S E S - - F L T H L S N M D V R N E T - - - I K E G - - - K K Y T T F N T T P K M S T Y L V A F I V A D L R Y 204

APE2 Y E D K L T G E T K - Y M A T T Q M E P T D A R R A F P C F D E P N L K A S F A I T L V S D P - - S L T H L S N M D V K N E Y - - - V K D G - - - K K V T L F N T T P K M S T Y L V A F I V A E L K Y 300

LTA4H P E Q T - S G K E H - P Y L F S Q C Q A I H C R A I L P C Q D T P S V K L T Y T A E V S V P K - - E L V A L M S A I R D G E T P - D P E D P S - - - R K I Y K F I Q K V P I P C Y L I A L V V G A L E S 209

Ap-B P E Q T - A G K K K - P F V Y T Q G Q A V L N R A F F P C F D T P A V K Y K Y S A L I E V P D - - G F T A V M S A S T - - - - - W E K R G - - - P N K F F F Q M C Q P I P S Y L I A L A I G D L V S 240

RNPEP-L1 P E L T - Y G C A K - P F V F T Q G H S V C N R S F F P C F D T P A V K C T Y S A V V K A P S - - G V Q V L M S A T R - - - S A - Y M E E E G - - - - V F H F H M E H P V P A Y L V A L V A G D L K P 268

ePepN - - - - - S G D A - - - - L C T Q C E A E G F R H I T Y Y L D R P D V L A R F T T K I I A D K I K Y P F L L S N G N R V A Q G E - - L E N G - - - - R H W V Q W Q D P F P K P C Y L F A L V A G D F D V 196

Cons

TMA108 L K T E I K L E G D R T I P V S I Y A - P W D I A - - N A A F T L - D T V Q K Y L P L L E S Y F K C P Y P L P K L D F V L L - P Y L S D M A M E N F G M I T I Q L N H L L I P P N A L A N E T V R E Q A 324

Ap-N V E K - - - - Q A S N G V L I R I W A R P S A I A A G H G D Y A L - N V T G P I L N F F A G H Y D T P Y P L P K S D Q I G L - P D F N A G A M E N W G L V T Y R E N S L L F D P L S - S S S S N K E R V 382

AP-Q V N R - - - - T E R G K E I R I W A R K D A I A N G S A D F A L - N I T G P I F S F L E D L F N I S Y S L P K T D I I A L - P S F D N H A M E N W G L M I F D E S G L L L E P K D - Q L T E K K T L I 409

TRH-DE R E T - - - - T T K S G V V R L Y A R P D A I R R G S G D Y A L - H I T K R L I E F Y E D Y F K V P Y S L P K L D L L A V - P K H P Y A A M E N W G L S I F V E Q R I L L D P S V - S S I S Y L L D V 479

ERAP2 L S G - - - - F T S S G V K V S I Y A S P D K R N - - Q T H Y A L - Q A S L K L L D F Y E K Y F D I Y Y P L S K L D L I A I - P D F A P G A M E N W G L I T Y R E T S L L F D P K T - S S A S D K L W V 364

ERAP1 V S K - - - - I T K S G V K V S V Y A V P D K I N - - Q A D Y A L - D A A V T L L E F Y E D Y F S I P Y P L P K Q D L A A I - P D F Q S G A M E N W G L T T Y R E S A L L F D A E K - S S A S S K L G I 347

IRAP L S Q - - - - D V N G T L V S I Y A V P E N I G - - Q V H Y A L - E T T V K L L E F F Q N Y F E I Q Y P L K K L D L V A I - P D F E A G A M E N W G L L T F R E E T L L Y D S N T - S S M A D R K L V 439

Ap-A V K R - - - - I S N S G K P L T I Y V Q P E Q K H - - T A E Y A A - N I T K S V F D Y F E E Y F A M N Y S L P K L D K I A I - P D F G T G A M E N W G L I T Y R E T N L L Y D P K E - S A S S N Q Q R V 387

PSA V E T - - - - R S K D G V C V R V Y T P V G K A E - - Q G K F A L - E V A A K T L P F Y K D Y F N V P Y P L P K I D L I A I - A D F A A G A M E N W G L V T Y R E T A L L I D P K N - S C S S S R Q W V 346

AAP1 V E S - - - - - N N F R I P V R V Y S T P G D E K - - F G Q F A A - N L A A R T L R F F E D T F N I E Y P L P K M D M V A V - H E F S A G A M E N W G L V T Y R V I D L L L D I E N - S S L D R I Q R V 294

APE2 V E S - - - - - K N F R I P V R V Y A T P G N E K - - H G Q F A A - D L T A K T L A F F E K T F G I Q Y P L P K M D N V A V - H E F S A G A M E N W G L V T Y R V V D L L D K D N - S T L D R I Q R V 390

LTA4H R Q I - - - - - G P R T L V W S E K E Q V E - - K S A Y E F - S E T E S M L K I A E D L G G - P Y V W G Q Y D L L V L P P S F P Y G G M E N P C L - T F V T P T L L A G D K S - - - - - L 287

Ap-B A E V - - - - - G P R S R V W A E P C L I D - - A A K E E Y N G V I E E F L A T G E K L F G - P Y V W G R Y D L L F M P P S F P F G G M E N P C L - T F V T P C L L A G D R S - - - - - L 319

RNPEP-L1 A D I - - - - - G P R S R V W A E P C L L P - - T A T S K L S G A V E Q W L S A A E R L Y G - P Y M W G R Y D I V F L P P S F P I V A M E N P C L - T F I I S S I L E S D E F - - - - - L 347

ePepN L R D T F T T R S G R E V A L E L Y V D R G N L D - - R A P W A M - T S L K N S M K W D E E R F G L E Y D L D I Y M I V A V - D F F N M G A M E N K G L N I F N S K Y V L A R T D T - A T D K D Y L D I 291

Cons Z Z N 2 C  
TMA108 QQQLIVHELVHQWFMGNYSIFDSESLWFNESFATWLACHILEQNGDL SHYWTSEP-YLLQQVEPTMCRDAADVNGRSIFQIAQRNTGIDSQTSDFDPEAY 423  
Ap-N VTVIAHELAHQWFGNLSVTEIWWNDLWLNENGFASYVE--YLGADYAEPWNLKDL-MVLNDVYRVMASVDALASSHP LSTPASEINTP--AQISELFDAISY 477  
AP-Q SYVVSHEIGHQWFGNLSVTMNVWNNIWLNEGFA SYFE--FEVINYFNPKLPRNEI-FFSNILHNI LREDHALVTRAVAMKVENFKT---SEIQELFDIFTY 503  
TRH-DE TMVIVHEICHQWFGDLVTPVWWEDVWLKEGF A HYFE--FVGTDYLYPGWNMEKQRFLTDVLHEVMLL DGLASSHPVVSQEV LQA----TDIDRVFDWIA Y 572  
ERAP2 TRVIAHELAHQWFGNLSVTMEWWNDIWLKEGF A KYME--LIAVNATYPELQF-DD-YFLNVC FEVITKDSLNSSRPISKPAETP----TQIQEMFDEVS Y 455  
ERAP1 TMTVAHELAHQWFGNLSVTMEWWNDLWLNENGF A KFME--FVSVSVTHPELKVGD--YFFGKCFDAMEVDALNSSHPVSTPVENP----AQIREMFD DVS Y 438  
IRAP TKIIAHEL AHQWFGNLSVTMKWWNDLWLNENGF A TFME--YFSLEKIFKELSSYED--FLDARFKTMKK DSLNSSHPISSSVQSS----EQIEEMFDSL S Y 530  
Ap-A ATVVAHEL VHQWFGNI VTM DWWEDLWLNENGF A SFFE--FLGVNHAETDWQMRDQ-MLLEDVLPVQED DSLMSSHP IIVTVTTP----DEITSVFDGIS Y 479  
PSA ALVVGHEL AHQWFGNLSVTMEWWTHLWLNENGF A SWIE--YLCVDHCFPEYDIWTQ-FVSADYTRAQEL DALDNSHP IEVSVGHP----SEVDEIFDAIS Y 438  
AAP1 AEVVIQHEL AHQWFGNLSVTMDW WEG L WL NENGF A TWMS--WYSCNKFQPEWKVWEQ-YVTDNLQRALNLD SLRSSHP IEVPVNNA----DEINQIFDAIS Y 386  
APE2 AEVVQHEL AHQWFGNLSVTMDW WEG L WL NENGF A TWMS--WYSCNEFQPEWKVWEQ-YVTDTLQHALSL DSLRSSHP IEVPVKKA----DEINQIFDAIS Y 482  
LTA4H SNVIAHEISHSWTGNLV TNKTWDHF WLNENGH T VYLERHICGRLFGEKFRHFNAL-GGWGELQNSV--KTFGETHPFTKLVDLTD--IDPDVA YSSVP Y 381  
Ap-B ADVIIEH EISHSWFGNLSV TNANWGEFWLNENGF T MYAQRRI ST ILFGAA YTCLEAA-TGRALLRQHM--DITGEENPLNKL RVKIEP--GVDPDDTYNETP Y 414  
RNPEP-L1 VIDVIHEVAHSWFGN AVTNATWEEMWLS EGLATYAQRRI TTET YGAAFTCLETA-FRLDALHRQM--KLLGEDSPVSKLQVKLEP--GVNPSHL MNLFTY 442  
ePepN ERVIGHE Y FHNW TGNRV TCRDWFQ LSLKENGLTVFRDQEFSSDLGSRAVNRINNV-RTMRGLQFAE--D ASPMAHP I RPDMV-----IEMNNFYTLTV Y 381

Cons  
TMA108 TKG IIMLRSLQLATG-ESH LQKGL ES VFEDTKTFHAR SVKPMDIWNHIGKFL-----K SQNITNFV--SSWTRTPGLP V 494  
Ap-N SKGASVLRML LSSFLS-EDVF KQGLAS YLH--TFAYQNTIYLNLDWHLQEAVNNRS-----IQLPTTVR DIM--NRWTLQMGFPV 551  
AP-Q SKGASMARM LSCFLN-EHLF VSALKS YLK--TFYSY SNAEQDDLWRHFQMAIDDQS-----TVILPATIKNIM--DSWTHQSGFPV 578  
TRH-DE KKGAA LIRMLANFMG-HSVFQ RGLQDYLT--IHKYGNAAARNDLWNTLSEALKRNG-----KYVNIQEV M--DQWTLQMGYPV 644  
ERAP2 NKGACILNMLKDFLG-EEKFQKGI IQY LK--KFSYRNAKND DLWSSLSNLA-----FLGENAEVKEMM--TTWTLQKGIPL 526  
ERAP1 DKGACILNMLREYLS-ADAFKSGIVQY LQ--KHSYKNTKNE DLWDSMASICPTDGVKGMDFCSRSQHSSSSSHWHQEGVDVKTMM--NTWTLQKGFPL 532  
IRAP FKGSS LLLMLKTYLS-EDVFQH AVVLYLH--NHSYASIQSDDLWDSFNEVT-----NQTLDVK RMM--KTWTLQKGFPL 599  
Ap-A SKGSSILRML EDWIK-PENFQKGCQMYLE--KYQFKNAKTSDFWAALEEAS-----R L PVKEVM--DTWTRQMGFPV 546  
PSA SKGASVIRML HDYIG-DKDFKKG MNMYLT--KFQ QKNAATE DLWESLENAS-----GKPIAAVM--NTWTKQMGFP L 505  
AAP1 SKGSS LLRMI SKWLG-EETF IKGVSQY LN--KFKYGNAKTGDLDALADAS-----GKDVCSVM--NIWTKRVGFPV 453  
APE2 SKGAS LLRMIS K WLG-EETF IKGVSQY LN--KFKYGNAKTE DLW DALADAS-----GKDVRSVM--NIWTKKVGFPV 549  
LTA4H EKG FALFYLEQLLGGPEIF LGFLKAYVE--KFSYKSITTD DWKDFLYSYFKD-----KVDVLNQVDWNAWLYSPGLPP 453  
Ap-B EKGFCFVSYLAHLVGDQDQF DSFLKAYVH--EFKFRSILADDFLDFYLEYFPEL K-----KKRVDIIPGF EFDRLNTPGWPP 490  
RNPEP-L1 EKG YCFVYYLSQLCGDPQR FDDFLRAYVE--KYKFTSVVAQDLLDSFLSFFPEL K-----EQSVDCRAGLEFERWLNATG PPL 518  
ePepN EKGAEVIRMIHTLLG-EENFQKGMQL YFE--RH D G SAATCDDFVQAMEDAS-----NVDSL SHF--RRWYSQS GTP I 447

Cons  
TMA108 VKVEVEEKDGKTQT KL T QHRFINQ--LSTE EK DQLEDV PYQVPLFGVLPD GKMDTKN-----VLLTDRTLKFDYP-----ILVINHLAQQ 572  
Ap-N ITV D---TSTG---T LSQEHFL LDP--DSNVTRPSEFN YVWIVPIT SIRDGRQQDYW-----LIDVRAQNDLF-----STSGNEWVLLN LNV TG 628  
AP-Q ITLN---VSTG---VMKQEPFYLE--NIKNR TLLTSNDTWIVPI LWIKNGTTQP-----LVWLDQSSKVFPEMQVSDSDHDWVILN LNMTG 656  
TRH-DE ITILGN-TTAENRIIITQ QHF IYDISAKTKALKLQNNSYLWQIPLTIVGNRSHVSS E-----AIIWVSNKSEHHRIT--YLDKGSWL LGNINQTG 732  
ERAP2 LVVK---QDGC-SLR LQQERFLQGVFQEDPEWRALQERYLWHIPLT YSSTS SSVNIHRH-----ILKSKTDTLDLP----E KTSWVKFNVDSNG 606  
ERAP1 ITIT---VRGR-NVHMKQEHYMKG-----SDGAPDTG YLWHVPLTFITSKSDM VHRF-----LLKTKTDLVLI L P----EEVEWIKFNVGMNG 606  
IRAP VTVQ---KKGK-ELFIQQERFFLN--MKPEIQPSDTSYLWHIPLSYVTEGRNYSKYQ-----SVSLLDKKSGVINLT----EEVLWVKVINMNG 679  
Ap-A LNVN-----G-VKNITQK RFL LDP-RANPSQPPS DLGYTWNIPV KWTEDNITSS-----VLFNRSEKEGITLNSSNP SGNAFLKINPDHIG 625  
PSA IYVEAEQVEDDRLLR LSQKKFCAG-----GSYVGEDCPQWMVPI TISTSEDPNQA KL-----KILMDKPEMNVV LK--NVKPDQWVKLNLGTVG 587  
AAP1 LSVK---EHKN-KITL TQHRYL-----STGDVKEEEDTTI YPI L LALKDSTGIDN-----TLV LNEKSATFELK-----NEEFFKINGDQSG 526  
APE2 ISVS---EDGNGKITFRQNRYL-----STADV K PDEDKT IYPVFLAL KTKNGVDS-----SVVLSERSKTIELE-----DPTFFKVNSEQSG 623  
LTA4H IKPNYD----- 459  
Ap-B YLPD---LSPG----- 498  
RNPEP-L1 AEPD---LSQG----- 526  
ePepN VTVKDD-YNPE-----TEQYTLTISQRTPATPDQA EKQPLHIPFAIELYDNEGKVIPLQKGGHPVNSVLNVTQAEQT FVFDNVYFQPVPALLCEFSAPV 540

Cons  
TMA108 Y Y R V S Y E S E E C Y A L I N D - K I T E E T L S E I D L R K I F L D L S Q F I G D - - - E G F Q N S I H L H G L F K I L N H I A S P S T K I - - - A S K Y W D P L S K G L E V L Q T - - - I D R A - 661  
Ap-N Y Y R V N Y D E E N W R K I Q T Q L Q R D H S A I P V I N R A Q I I N D A F N L A S A - - - - - H K V P V T L A L N N T L F L I E E R - - - - - Q Y M P W E A A L S S L S Y F K L - - M F D R S - 712  
AP-Q Y Y R V N Y D K L G W K K L N Q Q L E K D P K A I P V I H R L Q L I D D A F S L S K N - - - - - N Y I E I E T A L E L T K Y L A E E D - - - - - E I I V W H T V L V N L V T R D - - - L V S E V N 740  
TRH-DE Y F R V N Y D L R N W R L L I D Q L I R N H E V L S V S N R A G L I D D A F S L A R A - - - - - G Y L P Q N I P L E I I R Y L S E E K - - - - - D F L P W H A A S R A L Y P L D K - - L L D R M - 816  
ERAP2 Y Y I V H Y E G H G W D Q L I T Q L N Q N H T L L R P K D R V G L I H D V F Q L V G A - - - - - G R L T L D K A L D M T Y Y L Q H E T - - - - - S S P A L L E G L S Y L E S F Y H - - M M D R R N 691  
ERAP1 Y Y I V H Y E D D G W D S L T G L L K G T H T A V S S N D R A S L I N N A F Q L V S I - - - - - G K L S I E K A L D L S L Y L K H E T - - - - - E I M P V F Q G L N E L I P M Y K - - L M E K R D 691  
IRAP Y Y I V H Y A D D D W E A L I H Q L K I N P Y V L S D K D R A N L I N N I F E L A G L - - - - - G K V P L K R A F D L I N Y L G N E N - - - - - H T A P I T E A L F Q T D L I Y N - - L L E K L G 764  
Ap-A F Y R V N Y E V A T W D S I A T A L S L N H K T F S S A D R A S L I D D A F A L A R A - - - - - Q L L D Y K V A L N L T K Y L K R E E - - - - - N F L P W Q R V I S A V T Y I I S - - M F E D D - 709  
PSA F Y R T Q Y S S A M L E S L L P G I R D - - L S L P P V D R L G L Q N D L F S L A R A - - - - - G I I S T V E V L K V M E A F V N E P - - - - - N Y T V W S D L S C N L G I L S T - - L L S H T - 669  
AAP1 I F I T S Y S D E R W A K L S K Q A - - - - N L L S V E D R V G L V A D A K A L S A S - - - - - G Y T S T T N F L N L I S N W K N E D - - - - - S F V V W E Q I I N S L S A L K S T W V F E P E - 608  
APE2 I Y I T S Y T D E R W A K L G Q Q A - - - - D L L S V E D R V G L V A D V K T L S A S - - - - - G Y T S T T N F L N L V S K W N N E K - - - - - S F V V W D Q I I N S I S S M K S T W L F E P K - 705  
LTA4H - - - - - M T L T N A C I A L S Q - - - - - R W I - - - - - 474  
Ap-B - - - - - D S L M K P A E E L A Q - - - - - L W A - - - - - 513  
RNPEP-L1 - - - - - S S L T R P V E A L F Q - - - - - L W T - - - - - 541  
ePepN K L E Y K W S D Q Q L T F L M R H A R N D F S R W D A A - - Q S L L A T Y I K L N V A R H Q Q G Q P L S L P V H V A D A F R A V L L D E K I D P A L A A E I L T L P S V N E M A E L F D - - I I D P I A 636

Cons  
TMA108 - S L T S S K L Q S F L K K K I V I P L F N K I D W P H G E F - - - - - D K S T N P H E L K V M S Q V L F L N K N S A K C A E L C Q I Y F K H L L - Q G P R - S S V P L E L V N S I L V V V S Q 749  
Ap-N - - E V Y G P M K N Y L K K Q V T - P L F I H F R N N T N N W R E - - - - - I P E N L M D Q Y S E V N A I S T A C S N G V P E C E E M V S G L F K Q W M E N P N N - N P I H P N L R S T V Y C N A I A 802  
AP-Q I Y D I Y S L L K R Y L L K R L N - - - - - L I W N I Y S T I I R E N V L A L Q D D Y L A L I S L E K L F V T A C W L G L E D C L Q L S K E L F A K W V D H P E - - N E I P Y P I K D V V L C Y G I A 832  
TRH-DE - - E N Y N I F N E Y I L K Q V A - T T Y I K L G W P K N N F N G S - - - - L V Q A S Y Q H E E L R R E V I M L A C S F G N K H C H Q Q A S T L I S D W I - S S N R - N R I P L N V R D I V Y C T G V S 907  
ERAP2 I S D I S E N L K R Y L L Q Y F K - P V I D R Q S W S D - - - - - K G S V W D R M L R S A L L K L A C D L N H A P C I Q K A A E L F S Q W M E S S G K - L N I P T D V L K I V Y S V G A Q 777  
ERAP1 M N E V E T Q F K A F L I R L L R - D L I D K Q T W T D - - - - - E G S V S E R M L R S Q L L L L A C V H N Y Q P C V Q R A E G Y F R K W K E S N G N - L S L P V D V T L A V F A V G A Q 777  
IRAP Y M D L A S R L V T R V F K L L Q - N Q I Q Q Q T W T D - - - - - E G T P S M R E L R S A L L E F A C T H N L G N C S T T A M K L F D D W M A S N G T - Q S L P T D V M T T V F K V G A K 850  
Ap-A - K E L Y P M I E E Y F Q G Q V K - P I A D S L G W N D - - - - - A G D H V T K L L R S S V L G F A C K M G D R E A L N N A S S L F E Q W L - - N G T - V S L P V N L R L L V Y R Y G M Q 792  
PSA - - D F Y E E I Q E F V K D V F S - P I G E R L G W D P K P - - - - - G E G H L D A L L R G L V L G K L G K A G H K A T L E E A R R R F K D H V - - E G K - Q I L S A D L R S P V Y L T V L K 753  
AAP1 - - D I L N A L D K F T L D L V L - N K L S E L G W N I G E - - - - - D D S F A I Q R L K V T L F S A A C T S G N E K M Q S I A V E M F E E Y A - N G N K - Q A I P A L F K A V V F N T V A R 693  
APE2 - - E T Q D A L D N F T K Q L I S - G M T H H L G W E F K S - - - - - S D S F S T Q R L K V T M F G A A C A A R D A D V E K A A L K M F T D Y C - S G N K - E A I P A L I K P I V F N T V A R 790  
LTA4H - - - - - T - - - - - A K E D D L N S F N A T D - - - - - L K D L S S H Q L N E F L A Q T L Q R - - - A P L P L G - - - - - 513  
Ap-B - - - - - A E E L D M K A I E A V A - - - - - I S P W K T Y Q L V Y F L D K I L Q K - - - S P L P P G - - - - - 551  
RNPEP-L1 - - - - - A E P L D Q A A A S A S A I - - - - - D I S K W R T F Q T A L F L D R L L D G - - - S P L P Q E - - - - - 581  
ePepN I A E V R E A L T R T L A T E L A D E L L A I Y N A N Y Q S E Y R - - - - - V E H E D I A K R T L R N A C L R F L A F G E T H L A D V L V S K Q F H E A - - - - - N N M T D A L A A L S A A V A A Q 724

Cons  
TMA108 H C A N I K Q W K K I F D L V K R S S C T G I T N H V I N M Y D Q N S S E T A M L I Q N G A I E S L G F C L D S D I V - K K T L N F I T S N I E S E G M E L A L F G F N Y N F K K R L N K N E K P Q D Q 848  
Ap-N Q G G E E - E W D F A W E Q F R N A T L V N E A D K L R A A L A C S K E L W I - - - - - L N R Y L S Y T L N P D L I R K Q D A T S T I I S I T - - - - - N N V 870  
AP-Q L G S D K - E W D I L L N T Y T N T T N K E E K I Q L A Y A M S C S K D P W I - - - - - L N R Y M E Y A I S T S P F - T S N E T N I I E V V A - - - - - S S E 899  
TRH-DE L L D E D - V W E F I W M K F H S T T A V S E K K I L L E A L T C S D D R N L - - - - - L N R L L N L S L N S E V V L D Q D A I D V I I H V A - - - - - R N P 975  
ERAP2 T T A - - - G W N Y L L E Q Y E L S M S S A E Q N K I L Y A L S T S K H Q E K - - - - - L L K L I E L G M E G K V I K T Q N L A A L L H A I A - - - - - R R P 843  
ERAP1 S T E - - - G W D F L Y S K Y Q F S L S S T E K S Q I E F A L C R T Q N K E K - - - - - L Q W L L D E S F K G D K I K T Q E F P Q I L T L I G - - - - - R N P 843  
IRAP T D K - - - G W S F L L G K Y I S I G S E A E K N K I L E A L A S S E D V R K - - - - - L Y W L M K S S L N G D N F R T Q K L S F I I R T V G - - - - - R H F 916  
Ap-A N S G N E I S W N Y T L E Q Y Q K T S L A Q E K E K L L Y G L A S V K N V T L - - - - - L S R Y L D L L K D T N L I K T Q D V F T V I R Y I S - - - - - Y N S 861  
PSA H G D G T - T L D I M L K L H K Q A D M Q E E K N R I E R V L G A T L L P D L - - - - - I Q K V L T F A L S E E V R - P Q D T V S V I G G V A G - - - - - G S K 821  
AAP1 L G G E N - N Y E K I F N I Y Q N P V S S E E K I I A L R A L G R F E D K E L - - - - - L E R T L S Y L L D G T V L - N Q D F Y I P M Q G I R - - - - - V H K 760  
APE2 V G G A E - N Y E K V Y K I Y L D P I S N D E K L A A L R S L G R F K E P K L - - - - - L E R T L G Y L F D G T V L - N Q D I Y I P M Q G M R - - - - - A H Q 857  
LTA4H - - - - - H I K R M Q E V Y N F N A I - - N N S E I - - - - - R F R W L R L C I Q S K W - - E D A I P L A L K M A T - - - - - 557  
Ap-B - - - - - N V K K L G D T Y P - S I S N A R N A E L - - - - - R L R W G Q I V L K N D H - - Q E D F W K V K E F L H - - - - - 596  
RNPEP-L1 - - - - - V V M S L S K C Y S - S L L D S M N A E I - - - - - R I R W L Q I V V R N D Y - - Y P D L H R V R R F L E - - - - - 626  
ePepN L P C R D A L M Q E Y D D K W H Q N G L V M D K W F I L Q A T S P A A N V L E T V - - R G L L Q H R S F T M S N - - - - P N R I R S L I G A F A G - - - - - S N P A A F H 798

Cons

```

TMA108 VVRETIWEWYMGNF DQWARKATRKGTTTGDHLHKALRSISLIIFQMFVADEPQKIEKFINLEKEKLGQS-----LLSLDDIWASVQQDE-----ES 934
Ap-N IGQGLVWDFVQSNWKKLFNDYGGGSFSFS-----NLIQAVTRRFSTEYELQQLEQFKKDNEETGFGSGTRALEQALEKTKANIKWVK-----EN 954
AP-Q VGRYVAKDFLVNNWQAVSKRY--GTQSLI-----NLIYTIGRTVTTDLQIVELQQFFSNMLEEHQRI---RVHANLQTIKNE-----NLKN 975
TRH-DE HGRDLAWKFFRDKWKILNTRYGEALFMNS-----KLISGVTEFLNTEGELKELKNFMKNYDGVAAAS---FSRAVETVEANVRWKM-----LY 1055
ERAP2 KGQQQLAWDFVRENWTHLLKFKFDLGSYDIR-----MIISGTTAHFSSKDKLQEVKLFESLEAQQGSHL--DIFQTVLETITKNIKWLE-----KN 925
ERAP1 VGYPLAWQFLRKNWNKLVQKFELGSSSIA-----HMVMGTTNQFSTRTRLEEVKGFSSSLKENGSQL--RCVQQTIETIEENIGWMD-----KN 925
IRAP PGHLLAWDFVKENWNKLVQKFPPLGSYTIQ-----NIVAGSTYLFSTKTHLSEVQAFFENQSEATFRL--RCVQEALEVIQLNIQWME-----KN 998
Ap-A YGKNMAWNWIQLNWDYLVNRYTLNNRNLG-----RIVT-IAEPFNTELQLWQMESFFAKYPQAGAGE--KPREQVLETVKNNIEWLK-----QH 942
PSA HGRKAAWKFIKDNWEELYNRYQ-GGFLIS-----RLIKLSVEGFAVDKMAGEVKAFFESH PAPS AER---TIQQCCENILLNAAWLK-----RD 901
AAP1 KGIERLWAWMQEHWDEIAKRLQPGSPVLG-----GVLTLGLTNFTSFEALEKISAFYSRKVTKGFDQ---TLAQALDTIRSKAQWVS-----RD 841
APE2 EGVEALWNWVKKNWDELVKRLPPGLSMLG-----SVVTLGTSGFTSMQKIDEIKKFFATKSTKGFDQ---SLAQSLDTITSKAQWVN-----RD 938
LTA4H --EQGRMKFTRPLFKDLAA-----FDKSHDQAVRTYQEHKASMPVPT-AMLVGKDLKVD-----608
Ap-B --NQGKQKYTLPLYHAMMGG-----SEVAQTLAKETFASTASQLHSNV-VNYVQQIVAPKGS-----650
RNPEP-L1 --SQMSRMYTIPLYEDLCT-----GALKSFALEV FYQTQGR LHPNL-RRAIQQILSQGLGSSTEPASEPSTELGKAE 695
ePepN AEDGSGYLFVLEMLTDLNSR---NPQVAS-----RLI-----EPLIRLKRYDAKRQEK-----MRAALEQLKG-----LEN 856

```

Cons

```

TMA108 RKT---IRRDLASLV-----946
Ap-N KEV---VLQWFTENSK-----967
AP-Q KKL SARI AAWLRRNT-----990
TRH-DE QDE---LFQWL GKALRH-----1069
ERAP2 LPT---LRTWLMVNT-----937
ERAP1 FDK---IRVWLQSEKLEHDP---EADATG 948
IRAP LKS---LTWWL-----1006
Ap-A RNT---IREWFFNLL ESG-----957
PSA AES---IHQYLLQRKASP-----PTV 919
AAP1 REI---VATYLR EHEYDQ-----856
APE2 RDV---VNKY LKENGY Y-----952
LTA4H -----608
Ap-B -----650
RNPEP-L1 ADTDSDAQALLLGDEAPSSAISLRDVNVSA 725
ePepN LSGD--LYEKITKALA-----870

```
